# Supplementary material for: TGM4: an immunogenic prostate-restricted antigen
Source: HighWire-hosted journal article supplement (doi:10.1136/jitc-2020-001649), 2021-06-01
Supplement: jitc-2020-001649supp005_data_supplement.xlsx [file jitc-2020-001649supp005_data_supplement.xlsx]

## Sheet: combined(18747)
Genes_Names	Untreated_Mean	ADT_Mean	ADT+TR_Mean	Log2FC_ADT_vs_ADT+TR	p-val_ADT_vs_ADT+TR	Log2FC_ADT_vs_Untreated	p-val_ADT_vs_Untreated
Spink1	974656	242.083	866410	-11.8053	0.00259809	-11.9752	0.00273414
9530002B09Rik	997375	295.024	892918	-11.5635	0.00213375	-11.7231	0.00204629
Msmb	185657	304.48	586966	-10.9127	0.00275316	-9.25207	0.00512705
Tgm4	70377.3	171.134	258787	-10.5624	0.00501627	-8.68384	0.00423977
Gm12876	28468.1	24.2531	20116	-9.69596	4.83e-05	-10.197	6.31e-05
9530053A07Rik	179306	574.906	384976	-9.38723	0.00512519	-8.28488	0.00355593
Wfdc3	17628.4	25.6335	17022.3	-9.37518	0.00229872	-9.42565	3.87e-05
Abo	21839.4	18.5783	12236.6	-9.36337	0.00389538	-10.1991	0.000373444
Spin2e	24494.3	64.7073	16071.3	-7.95634	0.00789545	-8.5643	0.000889915
Gm2892	17366.8	53.8222	11612.5	-7.75326	0.00883207	-8.33391	0.0013352
Gm2854	19623.8	64.5659	13237.1	-7.67959	0.00930639	-8.24762	0.001496
Papss2	47167.8	155.938	24754.1	-7.31055	0.0036175	-8.24068	0.00112767
BB123696	6527.7	19.9388	2550.11	-6.99884	0.00965991	-8.35485	0.0015065
Gm2837	10547.3	56.0745	7126.73	-6.98975	0.00901185	-7.55531	0.001496
Apof	4356.17	109.81	6416.9	-5.8688	0.00607049	-5.30998	0.00129643
Sbp	271100	4318.1	241203	-5.80371	5.44e-05	-5.97229	0.000115923
AU022754	4567.99	128.504	6879.26	-5.74237	0.00139568	-5.15168	0.00112538
Sbpl	972667	17157.4	870113	-5.6643	9.64e-05	-5.82504	0.00019251
Rgs2	89658.3	861.463	38194.7	-5.47044	0.00754445	-6.70151	0.00019251
Cd59a	2848.95	171.733	7394.38	-5.42819	0.00213375	-4.05219	0.00144423
Azgp1	4258.79	101.636	4367.9	-5.42545	0.00748286	-5.38896	0.000667595
Aldh1a7	1269.07	48.7086	1904.56	-5.28914	0.00114566	-4.70345	0.00477384
Defb50	84900.6	5400.16	189625	-5.13401	0.00332371	-3.9747	0.00129643
9130409J20Rik	9776.3	186.091	6136.72	-5.04339	0.00748286	-5.71521	0.000792001
Cited2	84223.4	2620.51	83842.1	-4.99975	0.00147515	-5.0063	0.000810841
Aldh1a1	792.743	40.7153	958.74	-4.5575	0.00543758	-4.28321	0.00152964
Bmpr1b	3581.6	91.7754	1593.69	-4.11812	0.00783172	-5.28635	0.000397448
Psca	761.528	108.213	1626.44	-3.90977	0.00607049	-2.81502	0.00674776
Car5b	4778.13	224.429	3270.97	-3.86539	0.00213375	-4.41211	0.000186503
Mme	3666.22	374.513	4283.54	-3.51571	0.00942126	-3.2912	0.00854788
Aldh6a1	7756.03	459.041	4331.99	-3.23834	0.00857105	-4.07862	0.00474188
Tox3	4170.45	172.964	1625.87	-3.23266	0.00213375	-4.59166	0.00464138
Gpr155	2168.93	84.4151	787.393	-3.22151	0.00922063	-4.68334	0.000548195
Kdelr3	452.664	45.631	363.534	-2.994	0.00940348	-3.31035	0.00158724
Tesk2	5409.33	407.292	3098.13	-2.92726	0.000211568	-3.73131	0.00144734
Iqgap2	2209.91	289.038	2145.44	-2.89194	0.00607049	-2.93466	0.00721418
Dnajc3	11549.3	1830.1	12030.4	-2.71669	0.00790529	-2.65781	0.000778811
Rcn2	2090.82	197.998	1138.2	-2.52319	0.00908393	-3.4005	0.000778811
Arfgef3	1607.09	188.668	948.794	-2.33025	0.00607049	-3.09053	0.00613057
Phgdh	2591.53	374.64	1865.79	-2.31621	0.00374511	-2.79023	0.00249837
Ttc7b	422.125	39.7502	197.902	-2.31575	0.00748286	-3.40864	0.000795672
