# Supplementary figures and images for: TGM4: an immunogenic prostate-restricted antigen
Source: PubMed Central journal article supplement — J Immunother Cancer. 2021 Jun 30;9(6):e001649. doi: 10.1136/jitc-2020-001649 (PMC8246381; doi:10.1136/jitc-2020-001649), 2021-06-30

Supp. Figure 1

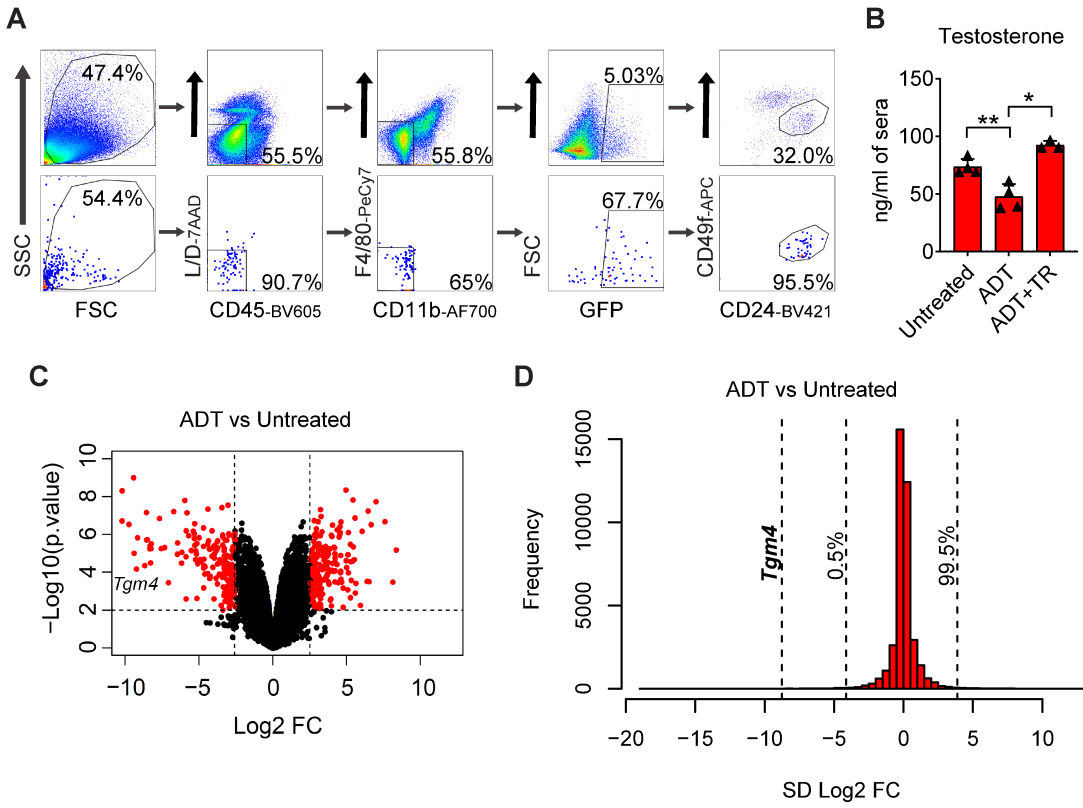

Supplement: jitc-2020-001649supp001.pdf [file jitc-2020-001649supp001.pdf]

Supp. Figure 2

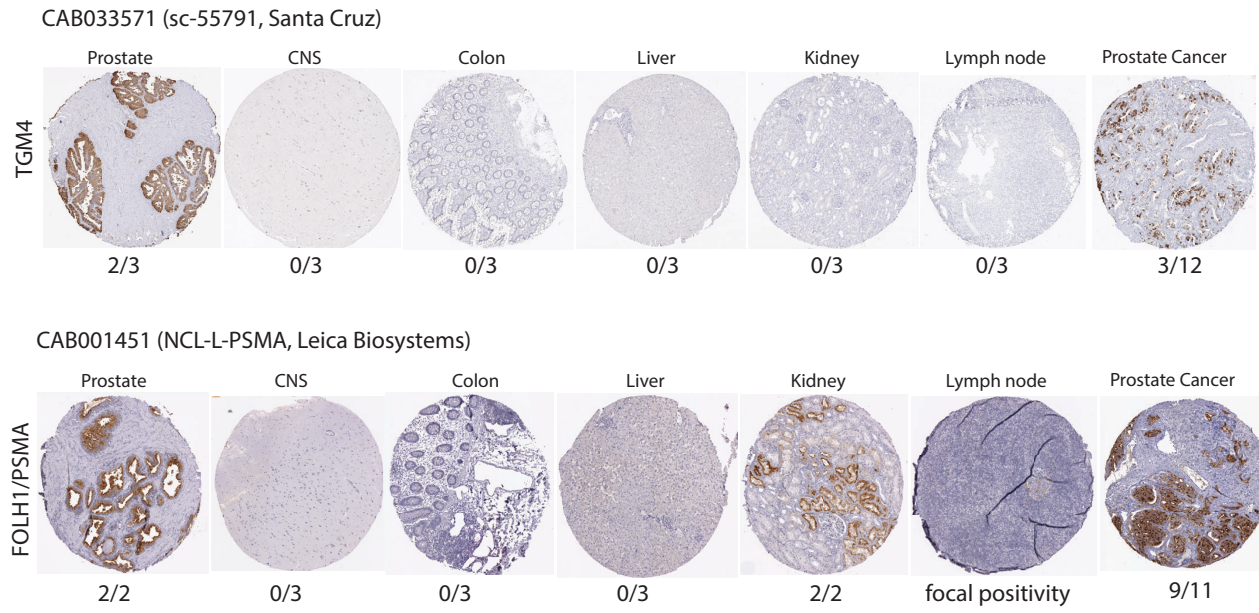

Supplement: jitc-2020-001649supp002.pdf [file jitc-2020-001649supp002.pdf]

Supp. Figure 3

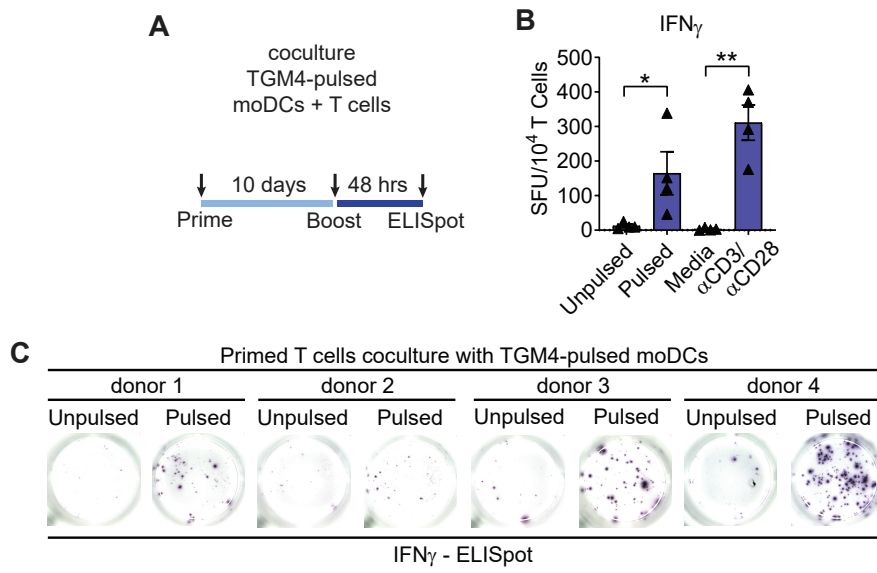

Supplement: jitc-2020-001649supp003.pdf [file jitc-2020-001649supp003.pdf]
