# Supplementary figures and images for: TGM4: an immunogenic prostate-restricted antigen
Source: HighWire-hosted journal article supplement (doi:10.1136/jitc-2020-001649), 2021-06-01

Supp. Figure 4

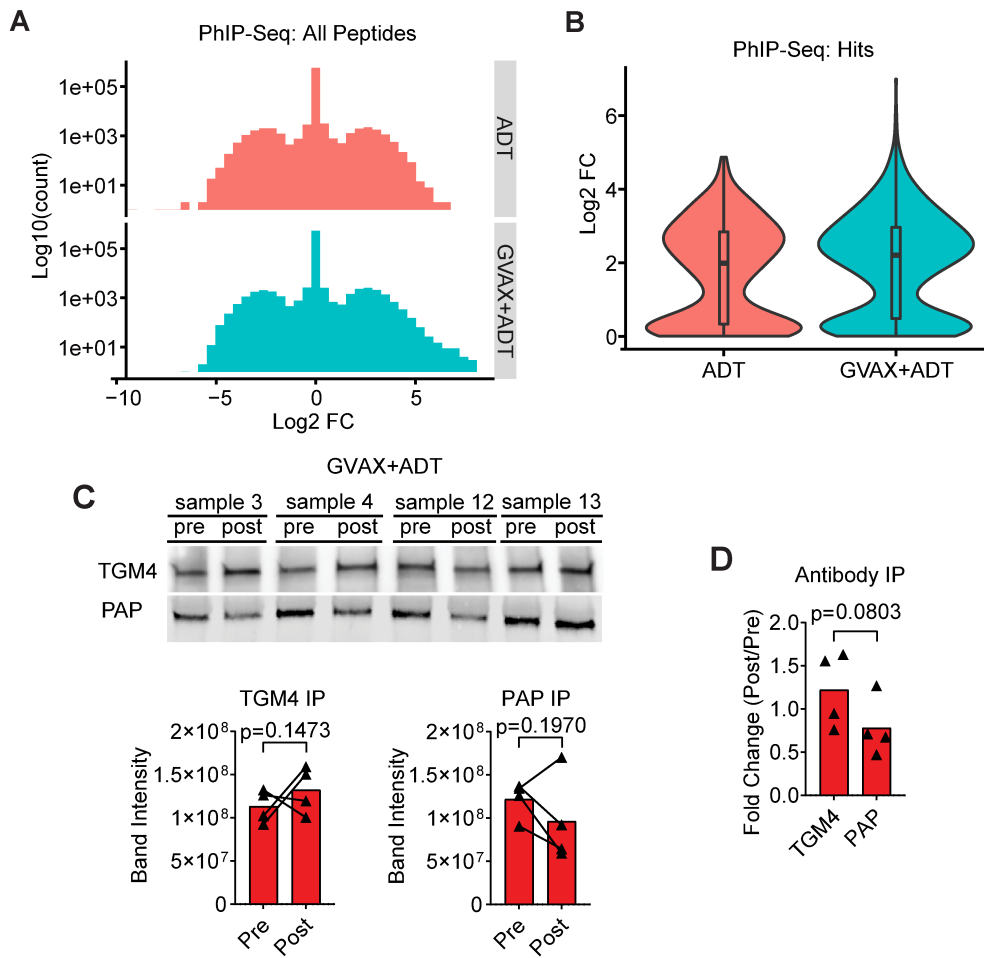

Supplement: jitc-2020-001649supp004_data_supplement.pdf [file jitc-2020-001649supp004_data_supplement.pdf]
